# Supplementary material
Source: MDPI journal article supplement (https://www.mdpi.com/2311-5637/8/4/176)
Supplement: s1 [file s1]

# **Algicidal Properties of Microbial Fermentation Products on the Inhibiting the Growth of Harmful Dinoflagellate Species**

Barathan Balaji Prasath<sup>1,2,3\*</sup>, Ying Wang<sup>1</sup>, Yu Ping Su<sup>1 2,3\*</sup>, Minghua Chen<sup>4</sup>, Yi Zheng<sup>4</sup>

<sup>1</sup>College of Environmental Science and Engineering, Fujian Normal University, Fuzhou 350007, PR China

<sup>2</sup>Fujian Key Laboratory of Pollution Control and Resource Recycling, Fuzhou 350007, PR China

<sup>3</sup>Fujian Province Research Centre for River and Lake Health Assessment, Fuzhou 350007, P. R. China

<sup>4</sup>College of Life Sciences, Fujian Normal University, Fuzhou 350007, PR China

**Correspondence:** \*Yuping Su ypsu@fjnu.edu.cn, College of Environmental Science and Engineering, Fujian Normal University /Fujian Key Laboratory of Pollution Control and Resource Recycling, Fuzhou 350007, PR China.

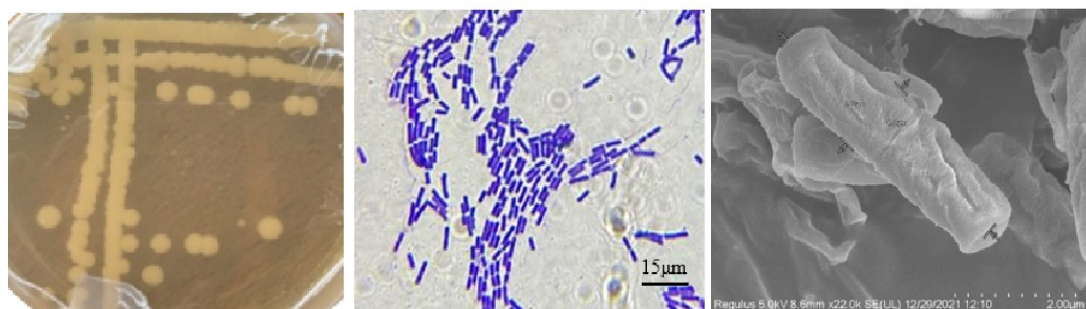

1(a)

1(b)

1(c)

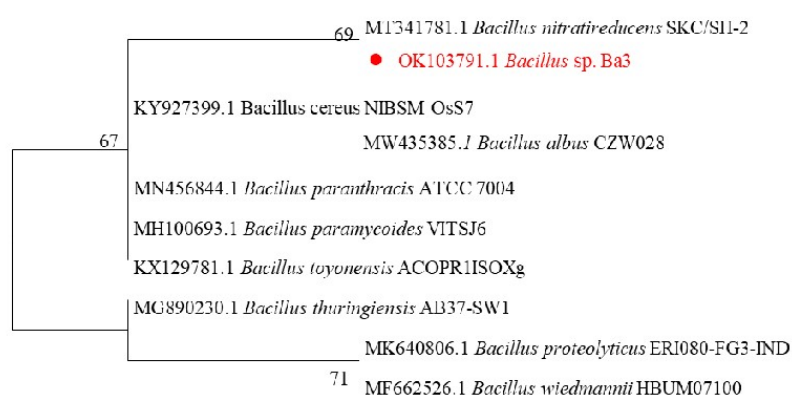

1(d)

**Supplementary Figure S1.** Identification of Ba3 by the morphology, plate shape (a); under microscope (b); SEM image (c), and 16S rRNA gene, which was shown as the phylogenetic tree (d).

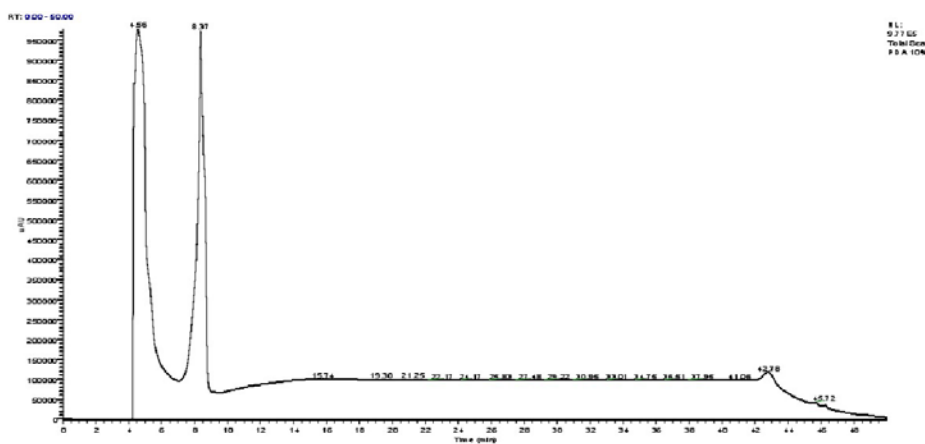

**Supplementary Figure S2.** High performance liquid chromatography of elution component 10% ethanol.

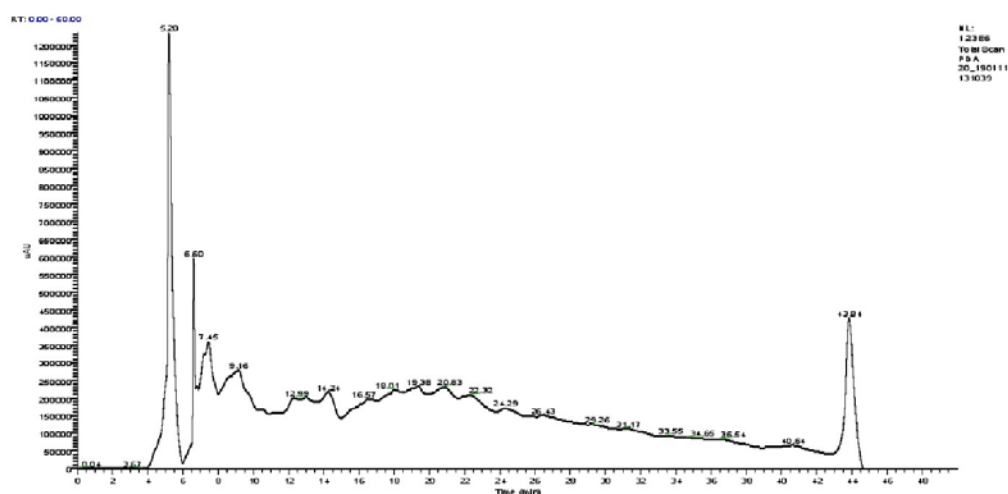

**Supplementary Figure S3.** High performance liquid chromatography of elution component 20% ethanol.

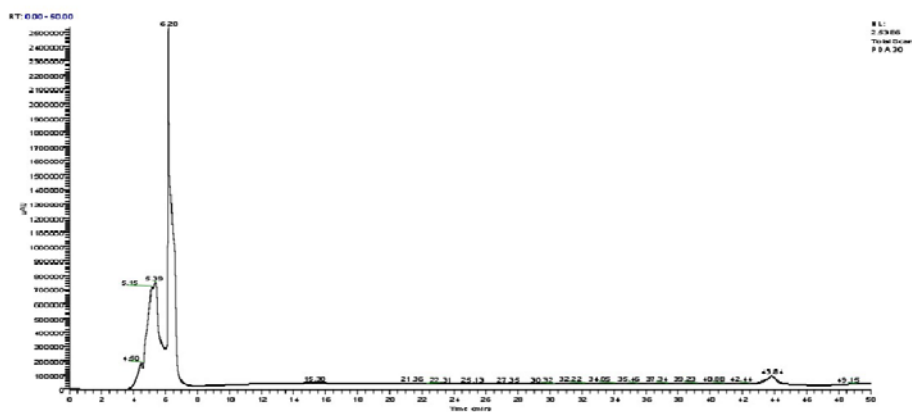

**Supplementary Figure S4.** High performance liquid chromatography of elution component 30% ethanol.

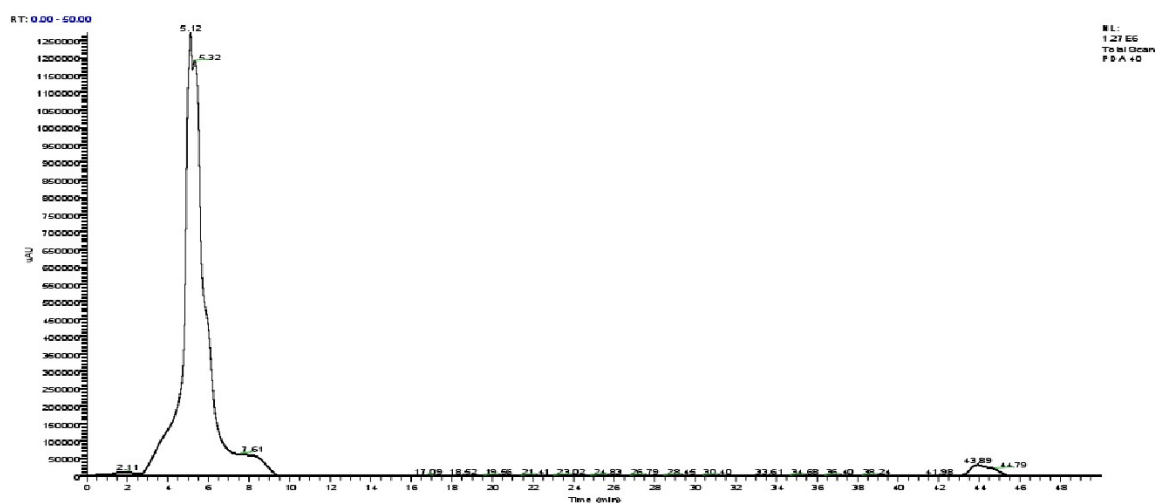

**Supplementary Figure S5.** High performance liquid chromatography of elution component 40% ethanol.

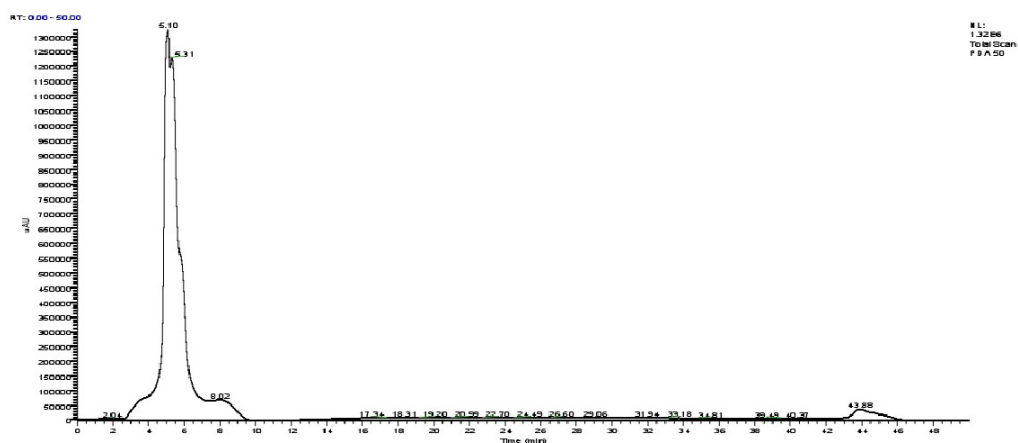

**Supplementary Figure S6.** High performance liquid chromatography of elution component 50% ethanol.

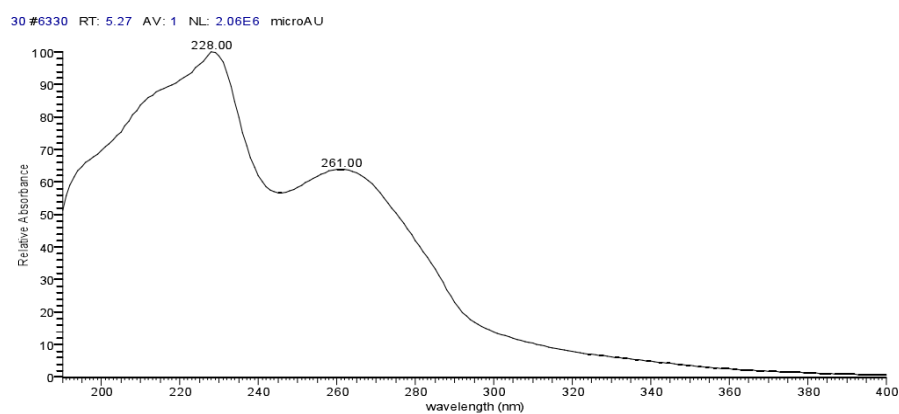

**Supplementary Figure S7.** Ultraviolet absorption peak of 5.39 min.

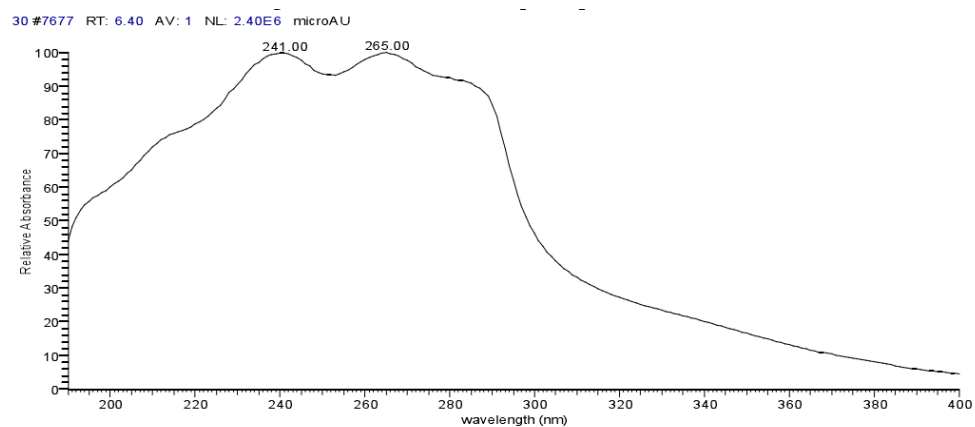

**Supplementary Figure S8.** Ultraviolet absorption peak of 6.20 min.
